# Supplementary material
Source: PubMed Central journal article supplement (PMC4249291)
Supplement: IAI.01838-14_zii999090958so1.pdf [file IAI.01838-14_zii999090958so1.pdf]

## SUPPLEMENTAL MATERIAL

**Table S1: Primers used in this study**

| Primer | Sequence (5' → 3')                                            |
|--------|---------------------------------------------------------------|
| JLP253 | CACTTCTAGAATGAAGAACTGGAAAACGCTGC                              |
| JLP254 | GCTCAAGCTTTTACGCATAATCCGGAACATCATACGGATAGTTGCTCAGGATTTTAACG   |
| MEL173 | ATCAAATAAAATAACGATAGGTCA                                      |
| MEL174 | CATGATGTTTATGCATCCGTA                                         |
| MEL243 | GCATGGATCCGTGAAAAAGTGGTTATTAGCTGCAG                           |
| MEL244 | CGATTCTAGATTACTTGTGCATCGTCGTCCTTGTAGTCTTTAACCTGTTTCAGTACGTCGG |
| MEL245 | GCATACTAGTGGATCTAGGTGAAGATCCTTTTTGATAATCTC                    |
| MEL246 | GCATTTAATTAACGCAAAAAGGCCATCCGTCAG                             |
| MEL247 | GCATTTAATTAAGTG TAGGCTGGAGCTGCTTC                             |
| MEL248 | GCATACTAGTCATATGAATATCCTCCTTAG                                |
| MEL253 | GCATGAGCTCGGTCACAACAATGAGGTTTTTATG                            |
| MEL275 | GCATGCGGCCGCTTTATCTCATAAACTGGTGTTATCTCAGCGG                   |
| MEL278 | GCATGCGGCCGCGCACCCAGAAACGCTGGTGA                              |
| MEL284 | GCATGGATCCTTACTTGTGCATCGTCGTCCTTGTAGTCCCAATGCTTAATCAGTGA      |
| MEL296 | GCCTTGTGCAGGACACGCTGAGAACGAACAATACGGCGCTGTGTAGGCTGGAGCTGCTTC  |
| MEL297 | GTCGATTCGCAGCTGTTGCTCCTGGCGGTAGCGGGTGTATCATATGAATATCCTCCTTAG  |
| MEL300 | GGTGTTGCAGGTGCTGGCTGAACAGGAGAAGTTGAACCTGGTGTAGGCTGGAGCTGCTTC  |
| MEL301 | GGGCGTGACTTCCATCCCCAGGACGGCCTCTTTAAATCCCATATGAAT ATCCTCCTTAG  |

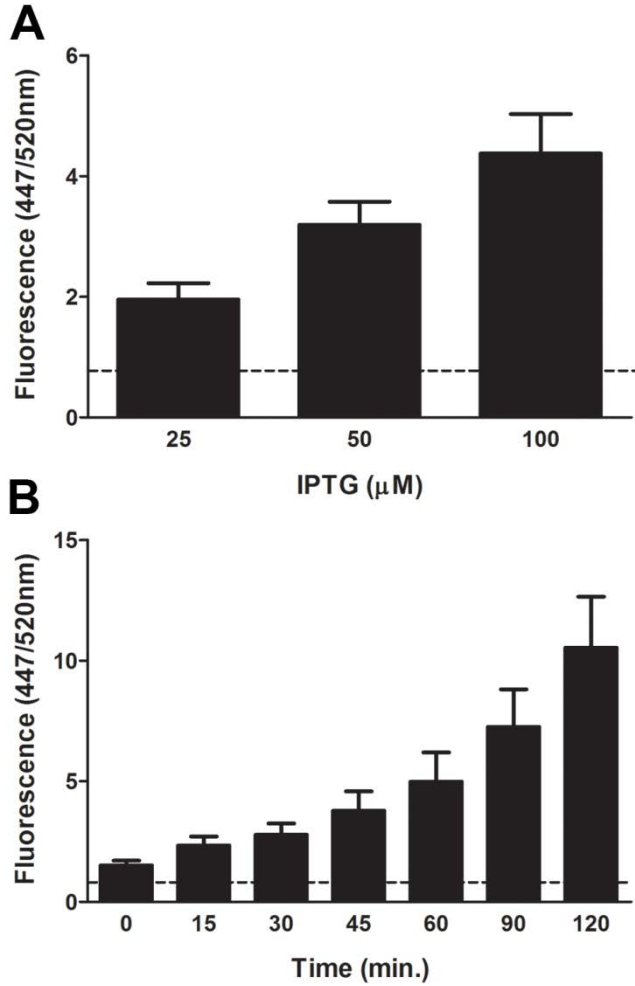

**Figure S1: Release of YbcL<sub>UTI</sub> from the periplasm is dose- and time-dependent.** Experiments were conducted and data are represented as described for Fig. 4. During infection of 5637 cells, the level of  $\beta$ -lactamase activity in the supernatant positively correlated with the level of IPTG induction (A) and the duration of infection (B).

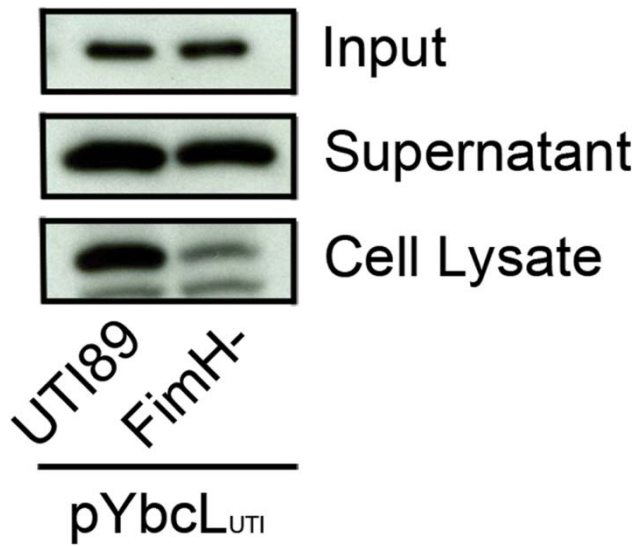

**Figure S2: Type 1 pili augment release of YbcL<sub>UTI</sub> from the periplasm.** Experiments were conducted and data are presented as described for Fig. 3. Compared to infection with UTI89/pYbcL<sub>UTI</sub>, less YbcL<sub>UTI</sub> was detected in the supernatant and 5637 cell lysate when a type 1 pilus mutant (UTI89/pYbcL<sub>UTI</sub>*fimH::kan*) was used as the bacterial inoculum.
